# Supplementary material for: Single-cell transcriptomics in bone marrow delineates CD56dimGranzymeK+ subset as intermediate stage in NK cell differentiation
Source: Front Immunol. 2022 Nov 24;13:1044398. doi: 10.3389/fimmu.2022.1044398 (PMC9730327; doi:10.3389/fimmu.2022.1044398)
Supplement: Supplementary file 1 [file DataSheet_1.pdf]

## *Supplementary Material*

### **1 Supplementary Figures and Tables**

#### **1.1 Supplementary Figures**

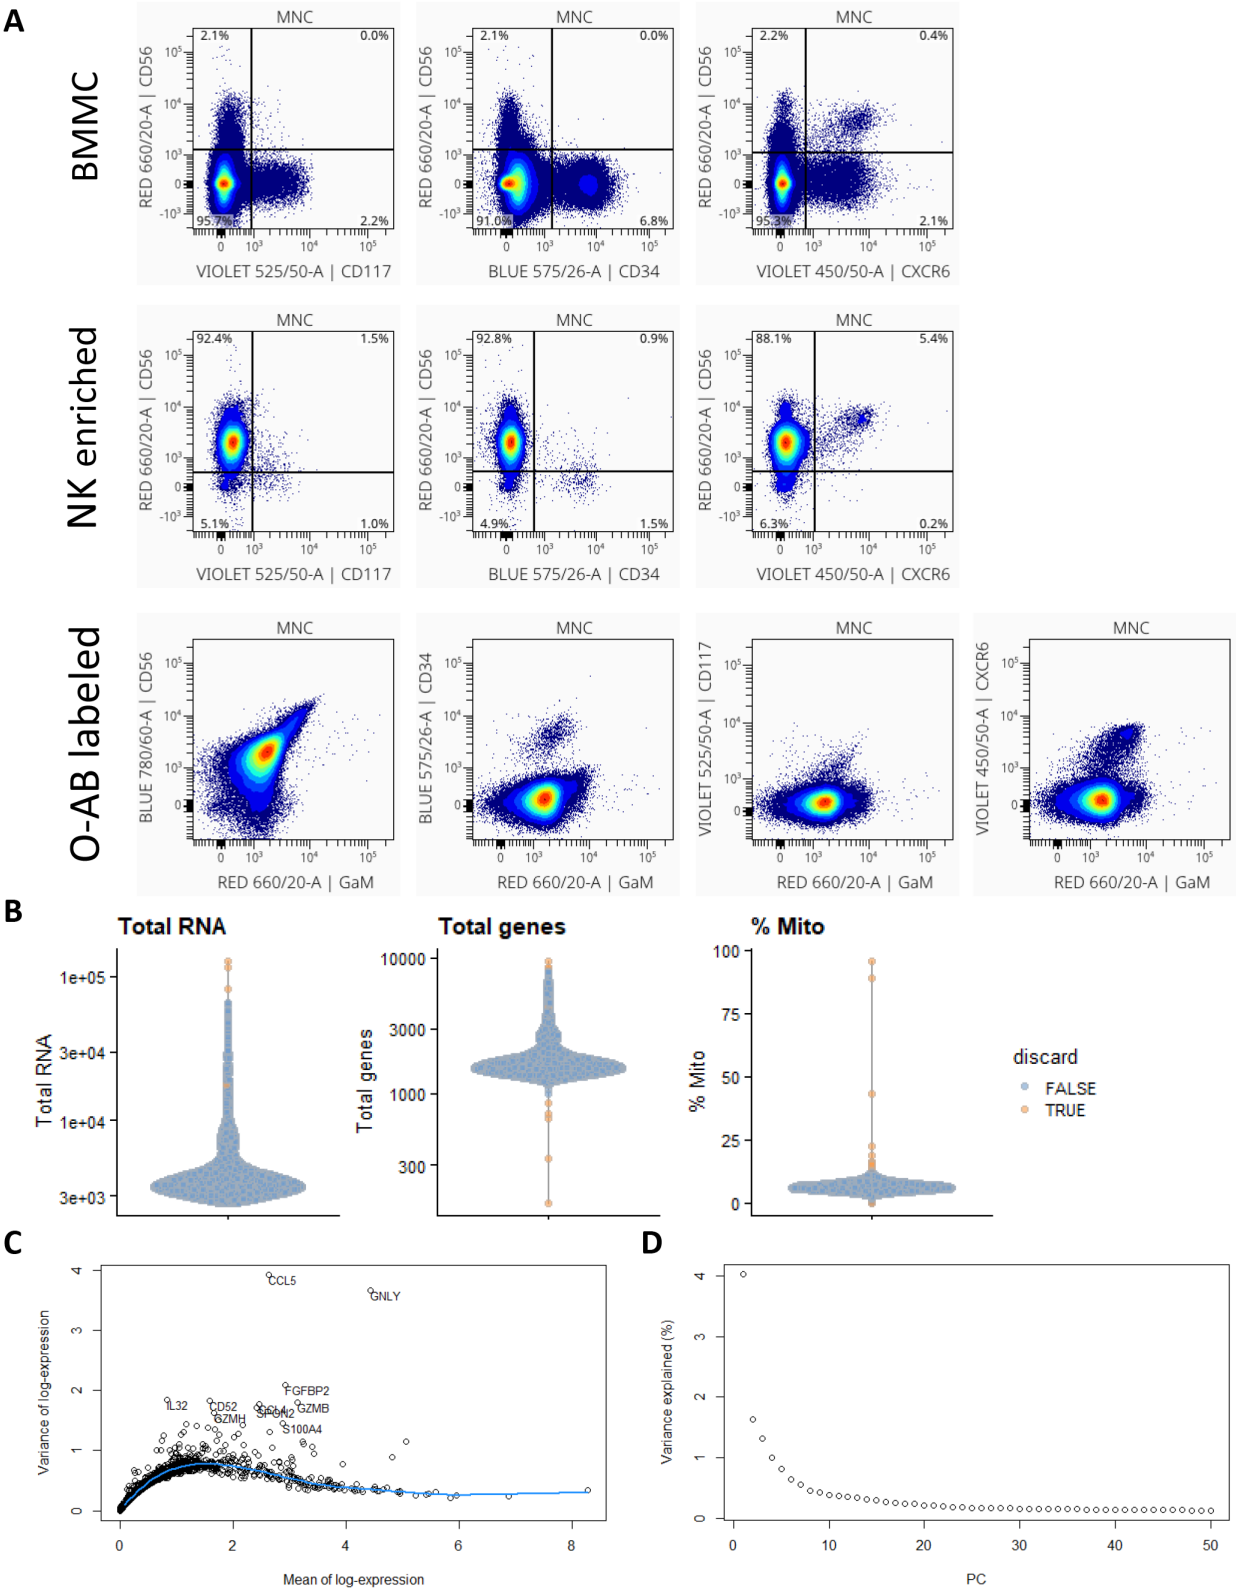

**Figure S1. Quality control and preprocessing single-cell RNA sequencing**

**(A)** Bone marrow mononuclear cells (BMMC) were negatively enriched for NK cells and labeled with oligonucleotide-conjugated antibodies (O-AB) against CD56, CXCR6, CD117 and CD34. By flow cytometry the composition of each fraction was tested. The O-AB labeled NK cells were stained with APC-conjugated goat-anti-mouse (GaM), followed by fluorochrome-conjugated antibodies against CD56, CD34, CD117 and CXCR6 to validate the binding of the oligonucleotide-conjugated antibodies. **(B)** Low-quality cells with <1000 expressed genes, >8300 expressed genes and >12.5% mitochondrial RNA were removed from further analyses (in total 21 cells). 454 remaining doublets were removed that clustered based on high mRNA and gene content. In total, 6525 cells were included in subsequent analyses. **(C)** After log-transformation and normalization, the top 2000 most variable genes were selected by computing the variance of the log-counts and fitting a trend to the variance with respect to abundance across the genes. The top 10 most variable genes are marked. **(D)** Principal component (PC) analysis was applied based on the top 2000 most variable genes. The top 20 PCs, explaining 14.2% of the variance, were retained for further analyses.

**A**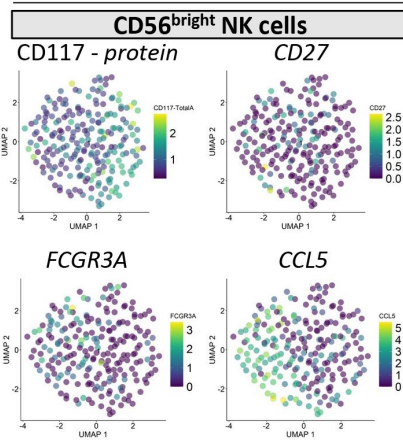**B**

Melsen (6286 cells)

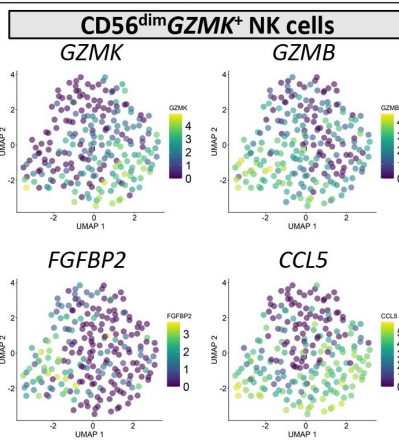**C**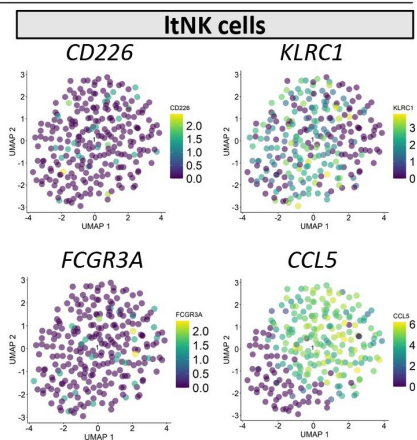**D**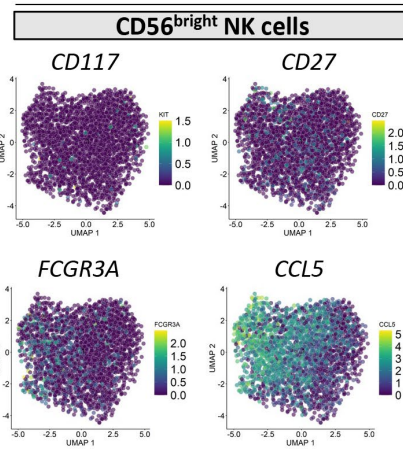**E**

Crinier+Yang+Melsen (39283 cells)

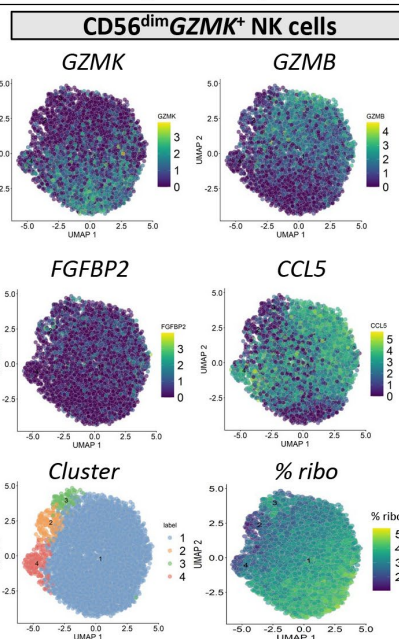**F**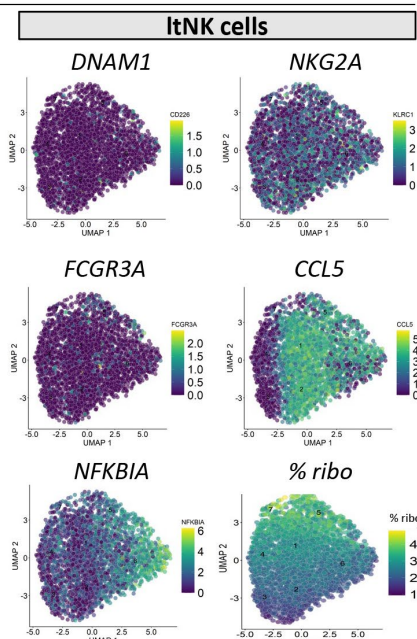**G**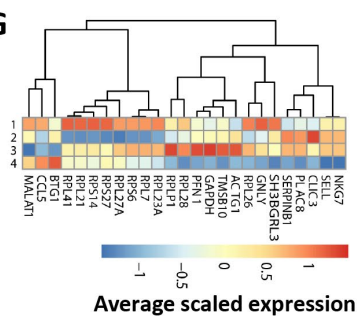**H**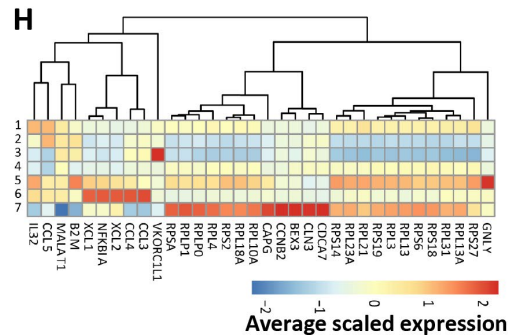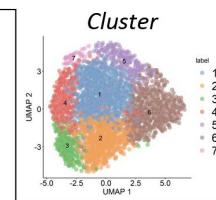

**Figure S2. Subclustering of CD56<sup>bright</sup>, CD56<sup>dim</sup>GZMK<sup>+</sup> and ltNK cells**

(A) CD56<sup>bright</sup> NK cells (n=228), (B) CD56<sup>dim</sup>GZMK<sup>+</sup> NK cells (n=225) and (C) lymphoid tissue (lt)NK cells (n=258) were selected and further subclustered (k=8) based on the first 20 principal components. In all populations only 1 cluster was identified. Genes which are coding for proteins that are only expressed by a fraction of the cells at protein level, and *CCL5* are shown. (D,E,F) To increase the number of cells, our bone marrow NK cells were integrated with single-cell RNA sequencing data from sorted NK cells from the Crinier (8 bone marrow donors, GSE159624) and Yang dataset (two blood and six bone marrow donors, GSE130430). (D) The CD56<sup>bright</sup> NK cells (n=2716), (E) CD56<sup>dim</sup>GZMK<sup>+</sup> NK cells (n=5971) and (F) ltNK cells (n=3146) were clustered (k=11) and visualized in a UMAP based on the corrected principal component scores (mutual nearest neighbors correction). In the CD56<sup>dim</sup>GZMK<sup>+</sup> NK and ltNK cell population multiple clusters were identified. The top 5 most differentially expressed genes for each (G) CD56<sup>dim</sup>GZMK<sup>+</sup> and (H) ltNK cell subcluster comparison (either up- or downregulated) were selected. The average scaled expression for each cluster is shown.

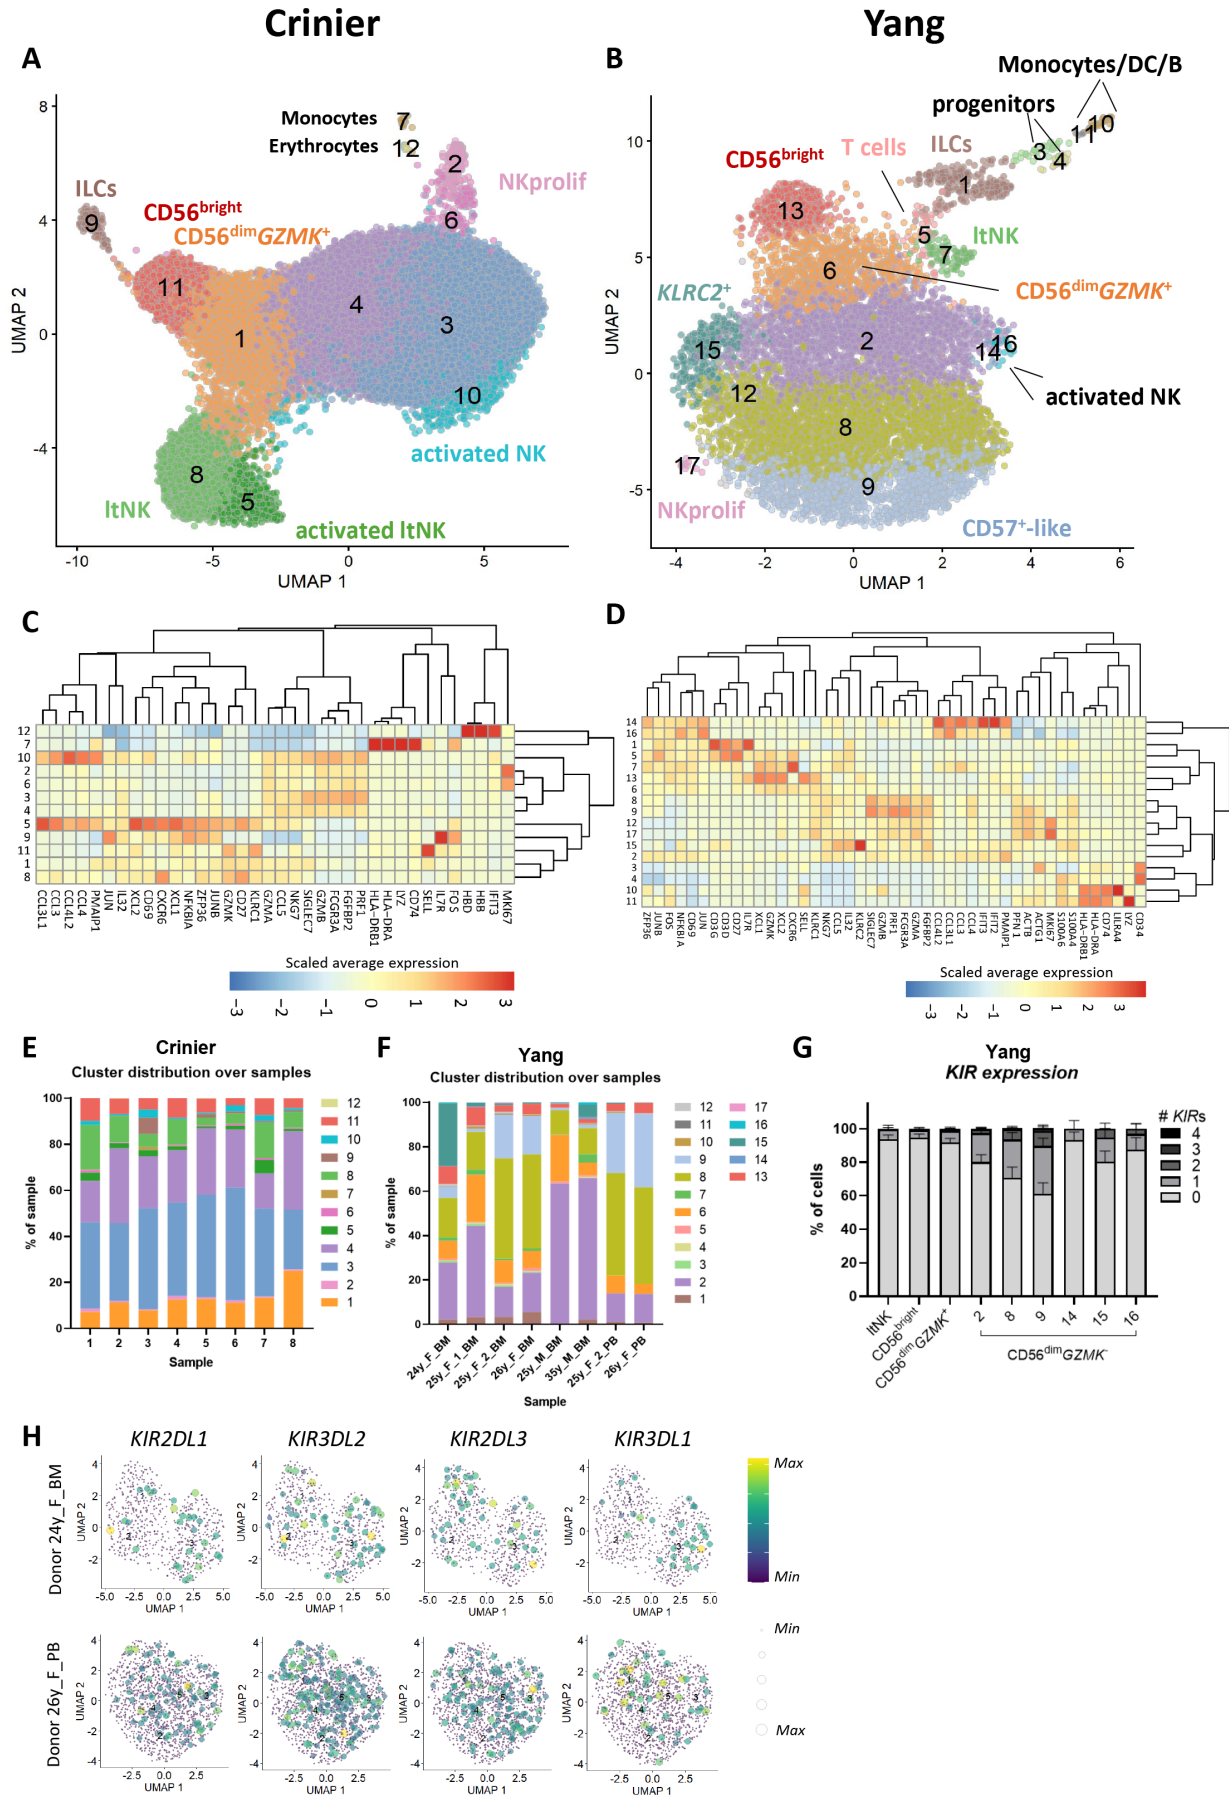

**Figure S3. Analysis of the single-cell RNA sequence dataset from Crinier and Yang et al.**

(A) Clustering of the single-cell RNA sequencing dataset (GSE159624) of Crinier et al. containing 24522 cells from 8 bone marrow donors resulted in 12 clusters. ItNK = lymphoid tissue NK. (B) Clustering of the single-cell RNA sequencing dataset (GSE130430) of Yang et al. containing 9071 cells from 6 bone marrow and 2 blood donors resulted in 17 clusters. (C,D) A selection of genes used to define the clusters of the C Crinier and D Yang dataset are included in the heatmap. The scaled average expression is shown. (E,F) Distribution of clusters per individual sample for the E Crinier and F Yang dataset. (G) The percentage of inhibitory *KIR* expressing cells for each NK cell cluster of the Yang dataset (n=8) was based on *KIR2DL1*, *KIR3DL2*, *KIR2DL3* and *KIR3DL1*. The detection limit for *KIR* gene expression was set at 0, based on the log2 normalized counts. The proliferating NK cells, representing a mixed population of NK cell subsets, and cluster 12 (<25 cells) were removed. The bars represent mean and standard error of the mean. (H) The CD56<sup>dim</sup>GZMK<sup>-</sup> cells from the Yang dataset were selected (cluster 2, 8, 9, 12, 14, 15 and 16) and each dataset was individually clustered. The inhibitory *KIR* expression of 2 donors with a high percentage of *KLRC2*<sup>+</sup> and CD57<sup>+</sup>-like NK cells is shown (24y\_F\_BM and 26y\_F\_PB, respectively). Again, no inhibitory *KIR*-driven clustering was observed. Both the color and the size of each dot represent the expression level.

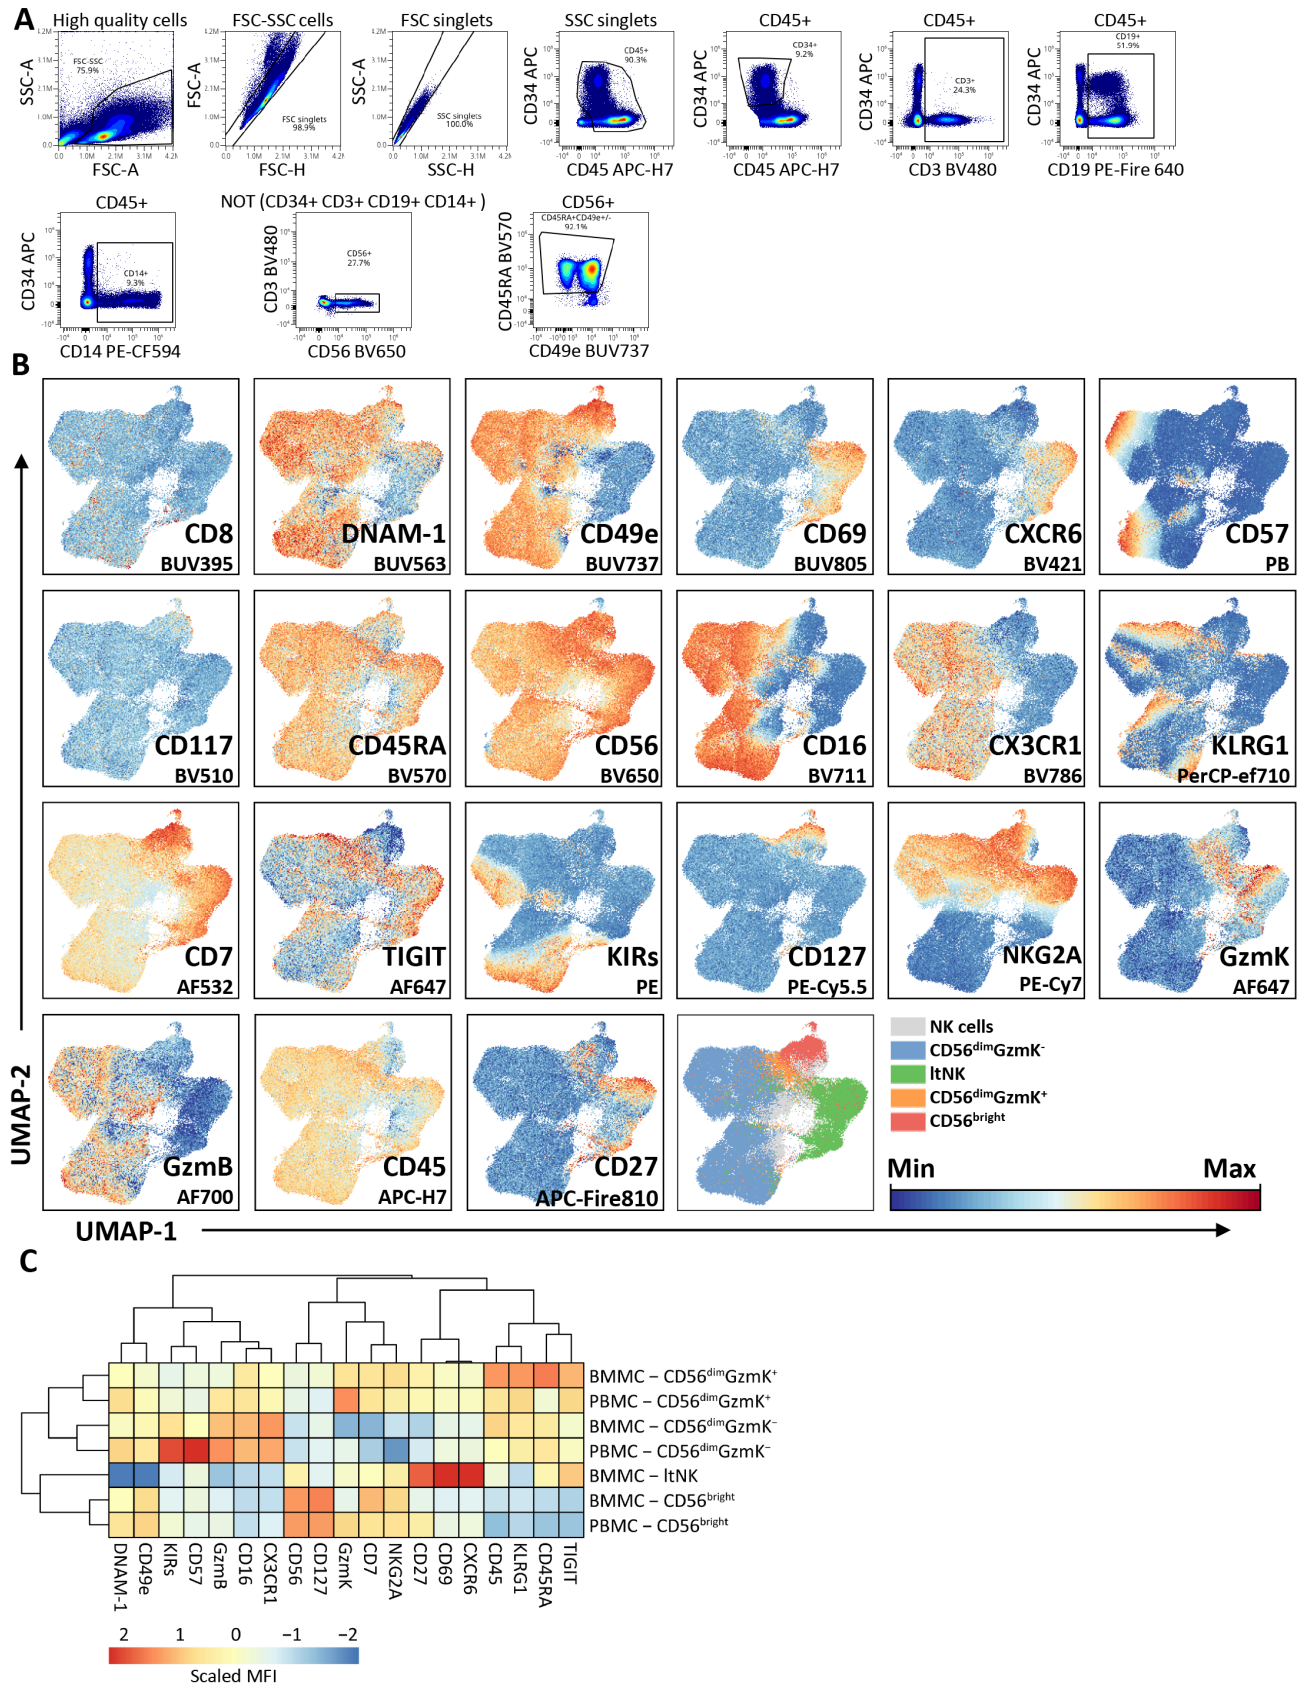

**Figure S4. UMAP embedding of spectral cytometry data of 14 bone marrow samples of healthy controls**

**(A)** High quality cells were selected based on the results of FlowAi. Single cells were gated based on forward and side scatter. NK cells were further defined as  $CD45^+CD34^-CD3^-CD19^-CD14^-CD56^+CD45RA^+$  **(B)** A UMAP embedding of NK cells derived from 14 healthy bone marrow samples, based on 21 NK cell markers as measured by spectral cytometry is shown. Lymphoid tissue (lt)NK cells were defined as  $CD69^+CD49e^-$  (Figure 4A). The non-ltNK cells were subdivided into  $CD56^{bright}CD16^{+/-}$  and  $CD56^{dim}CD16^+$  NK cells. **(C)** The heatmap indicates the scaled mean fluorescence intensity (MFI) expression of NK cell markers on the NK cell subsets in blood (3 donors) and bone marrow (14 donors).

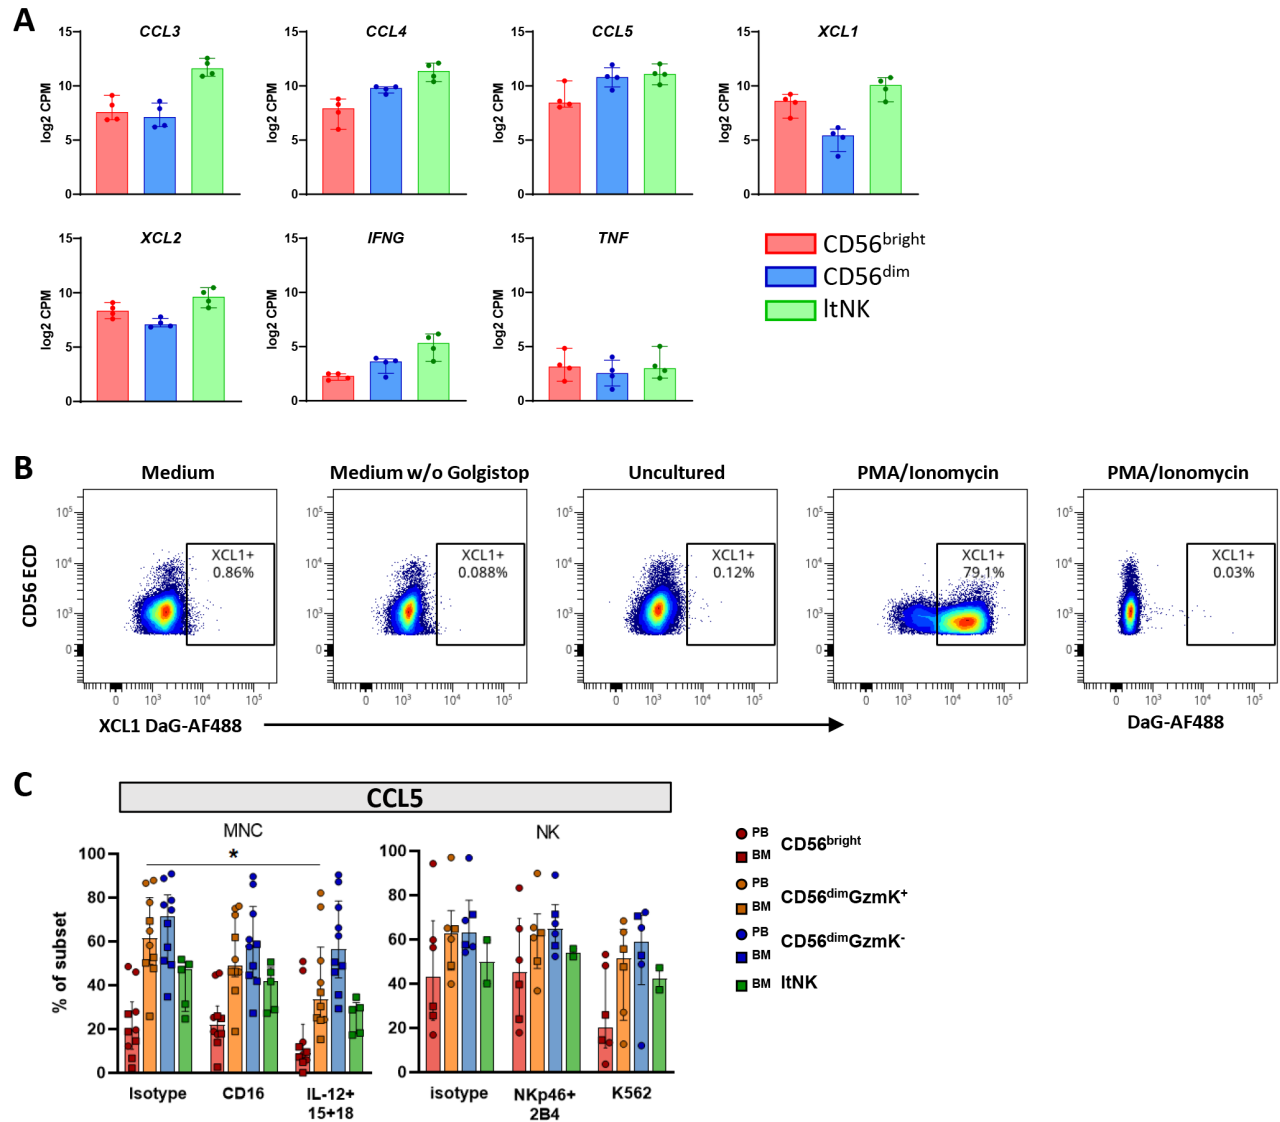

**Figure S5. Chemokine and cytokine production of NK cell subsets**

(A) Previously published bulk RNA sequence data (GSE116178) showed that each NK cell subset in bone marrow expresses *CCL3*, *CCL4*, *CCL5*, *XCL1*, *XCL2*, *IFNG* and *TNF* at the mRNA level (n=4). Bars indicate median and range. CPM = counts per million reads ItNK = lymphoid tissue NK. (B) XCL1 was intracellularly detected by a two-step staining protocol, using unconjugated goat anti-XCL1 and donkey-anti-goat (DaG) AF488. As a negative control, cells were stained with only DaG-AF488 (most right panel). NK cells from a representative blood donor are shown. (C) Intracellular CCL5 expression in NK cell subsets, either stimulated in bulk mononuclear cells (MNC, n=5 blood, n=5 bone marrow) or as enriched NK cell fraction (n=4 blood, n=2 bone marrow). Bars indicate median and interquartile range. A paired Friedman test was applied to test for differences with isotype control for each subset. Adjusted P-value\* < 0.05. PB=peripheral blood, BM=bone marrow.

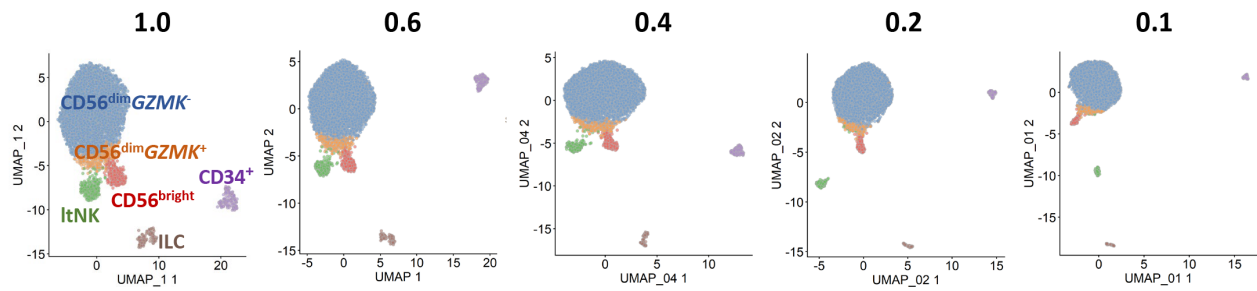

### Figure S6. NK cell development

The minimum distance parameter of UMAP (in other UMAP embeddings in this article set at 0.6) was adjusted to study the effect on the embedding. With a lower minimum distance, the CD56<sup>bright</sup> NK cells were still connected to the CD56<sup>dim</sup> NK cells, while the lymphoid tissue (It)NK cells were not.

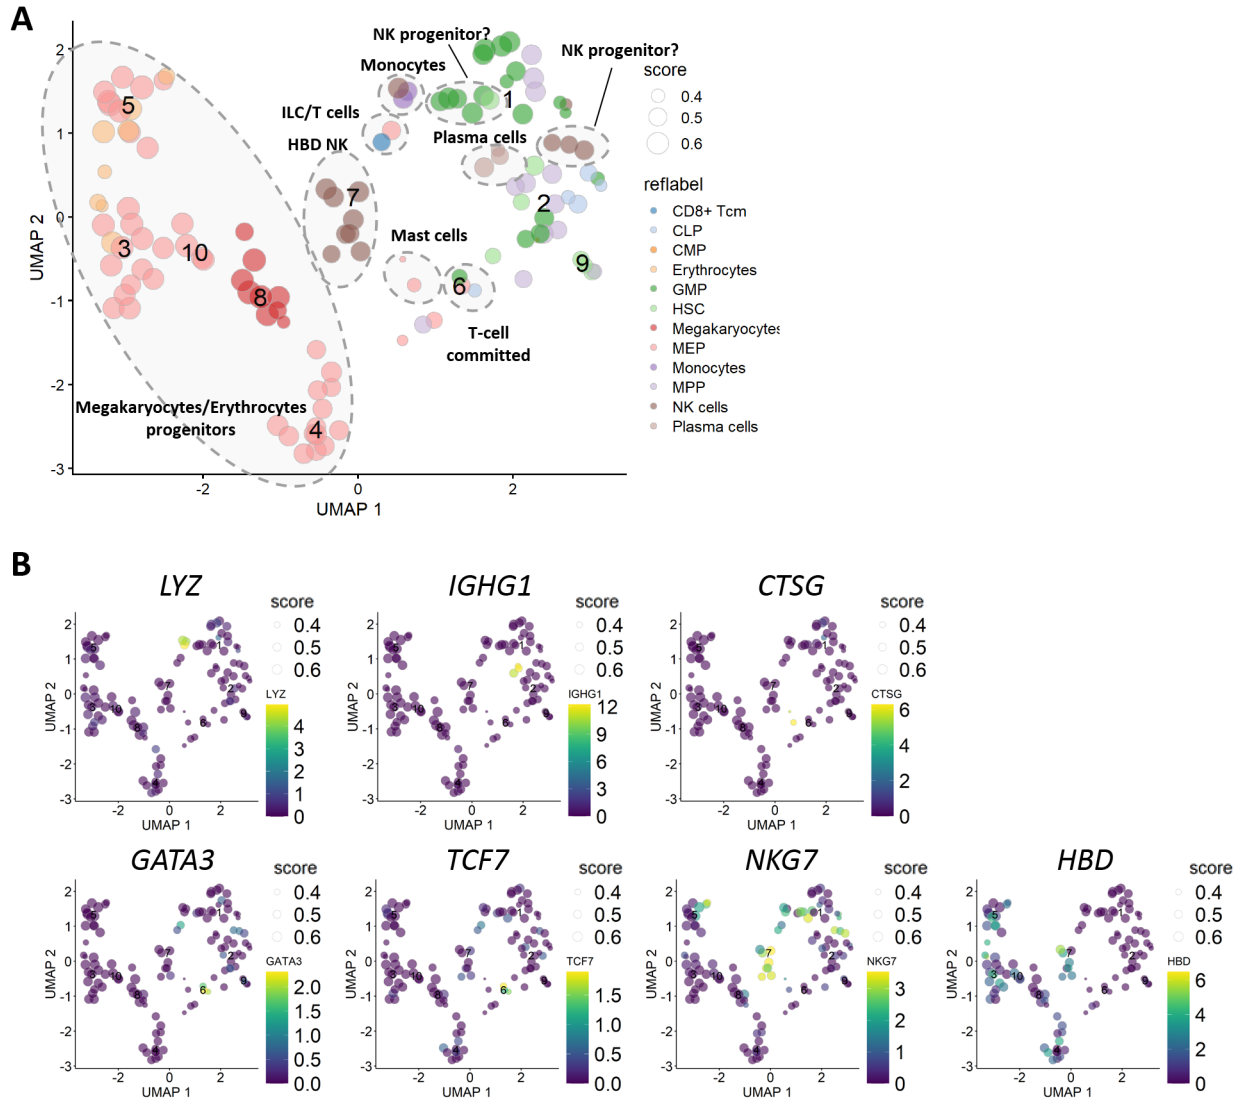

**Figure S7. Subclustering of CD34<sup>+</sup> population**

(A) The CD34<sup>+</sup> cells (n=126) in our dataset were selected and subclustered. For the UMAP, n\_neighbors=20, and min\_dist=0.1 was applied. In addition, reference-based analysis was performed based on bulk RNA sequence data of hematopoietic populations (Blueprint and Encode datasets). The size of the cells reflects the probability score (the bigger, the more likely the assignment of the reference label is correct). The *HBD*<sup>+</sup>*NKG7*<sup>+</sup> cells in cluster 7 are likely to represent NK cells contaminated with lysed erythrocytes. (B) The expression of a selection of genes is indicated on the UMAP plot.

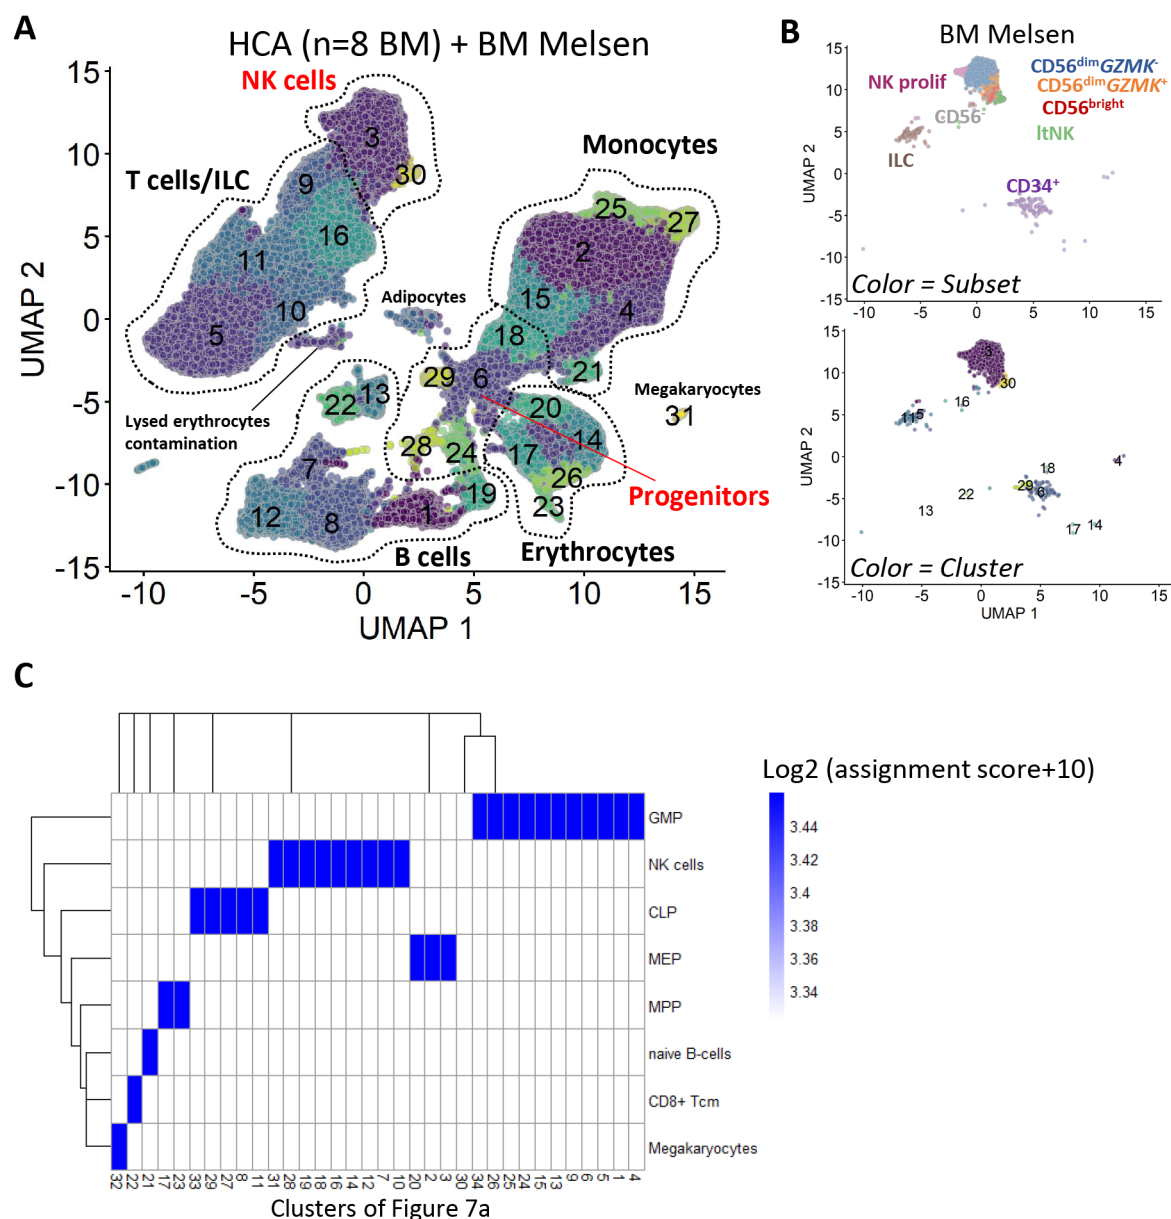

**Figure S8. Integration of NK cells with bone marrow cells from the human cell atlas**

(A) The bone marrow cells of 8 donors from the human cell atlas (HCA) single-cell RNA sequence dataset were integrated with our bone marrow NK cell dataset (total = 323466 cells). Each color on the UMAP (min. distance=0.4) represents a distinct cluster. (B) Cells from our bone marrow NK cell dataset were selected and plotted in the same UMAP embedding as in A. Cells were colored by their original subset assignment, or cluster assignment as indicated in A. ItNK = lymphoid tissue NK (C) Cluster 6, 18, 24, 28, 29 (progenitors) and 3, 30 (NK cells) from A were selected and re-clustered (total = 41476 cells), as visualized in Figure 7A. Reference-based analysis using the bulk RNA sequence Blueprint and Encode datasets was performed on each cluster for automatic annotation.

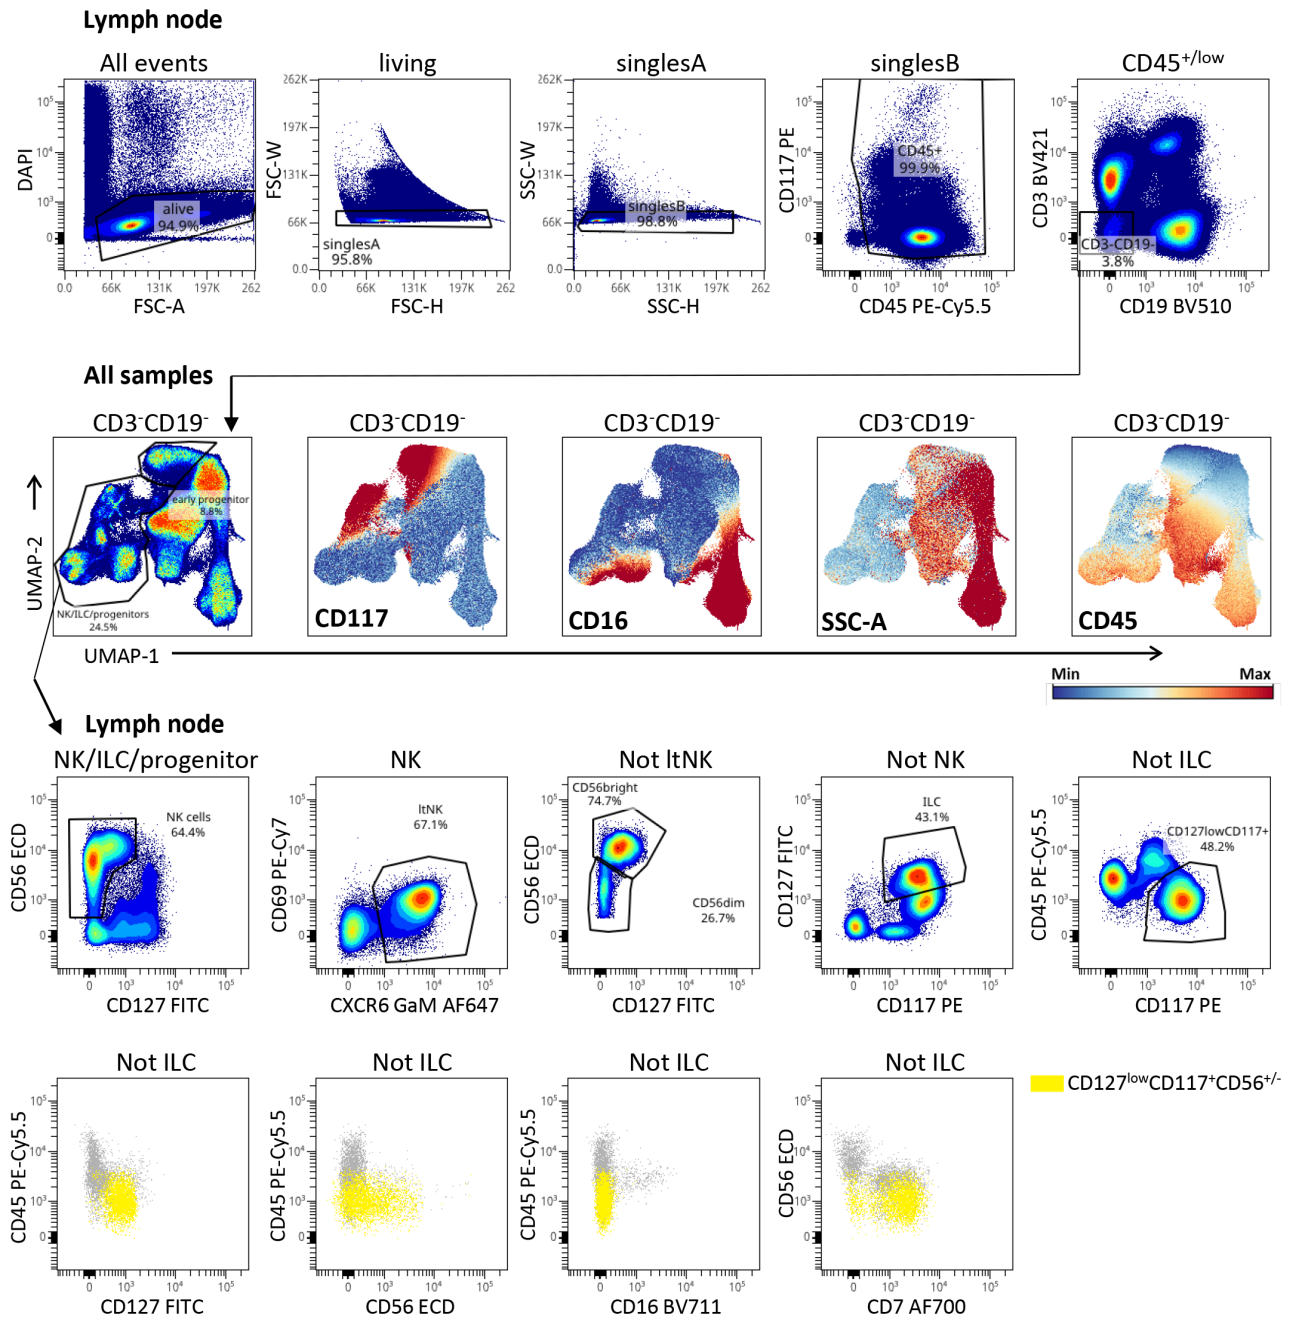

**Figure S9. NK cell development in secondary lymphoid tissues**

Gating strategy applied to study presence of NK progenitor cells in bone marrow, spleen, lymph node and tonsil. Dead and doublet cells were excluded per individual sample. Next, CD45<sup>+/low</sup>CD3<sup>+</sup>CD19<sup>-</sup> cells were gated and all samples were embedded in a UMAP. In the UMAP, early progenitors (CD117<sup>+</sup>CD16<sup>-</sup>SSC<sup>high</sup>CD45<sup>low</sup>) and a combination of NK, helper innate lymphoid cells (ILCs) and other progenitors were selected. Within the NK/ILC/progenitor gate, NK cell subsets, ILCs and the CD127<sup>low</sup>CD117<sup>+</sup>CD56<sup>+/+</sup> potential NK progenitor cells were defined per individual sample. A representative lymph node donor is shown in the first row, and last two rows. ItNK = lymphoid tissue NK, ILC= innate lymphoid cell.

**1.2    Supplementary Tables**

Table S1. Antibodies used for flow cytometry

| Specificity    |                                             | Antibody characteristics |         |             |                  |            |            |
|----------------|---------------------------------------------|--------------------------|---------|-------------|------------------|------------|------------|
| CD designation | Alternative name                            | Fluorochrome             | Type    | Clone       | Company          | Catalog#   | Panel      |
| CD3            | FCGR3A                                      | BV421                    | m-IgG1  | UCHT1       | Becton Dickinson | 562426     | LSR        |
| CD7            |                                             | AF700                    | m-IgG1  | M-T701      | Becton Dickinson | 561603     | LSR        |
| CD16           |                                             | BV711                    | m-IgG1  | 3G8         | Becton Dickinson | 563127     | LSR/Aurora |
| CD19           |                                             | BV510                    | m-IgG1  | SJ25C1      | Becton Dickinson | 562947     | LSR        |
| CD34           |                                             | PE                       | m-IgG1  | 8G12        | Becton Dickinson | 345802     | LSR        |
| CD45           | NCAM                                        | PE-Cy5.5                 | m-IgG1  | J33         | Beckman Coulter  | A54139     | LSR        |
| CD56           |                                             | APC                      | m-IgG1  | N901        | Beckman Coulter  | IM2474     | LSR        |
| CD56           |                                             | ECD                      | m-IgG1  | N901        | Beckman Coulter  | A82943     | LSR        |
| CD56           | NCAM                                        | PE-Cy7                   | m-IgG1  | N901        | Beckman Coulter  | A21692     | LSR        |
| CD69           | c-KIT                                       | PE-Cy7                   | m-IgG1  | L78         | Becton Dickinson | 335792     | LSR        |
| CD117          |                                             | PE                       | m-IgG1  | 104D2       | Becton Dickinson | 332785     | LSR        |
| CD117          |                                             | BV510                    | m-IgG1  | 104D2       | Biolegend        | 313220     | LSR/Aurora |
| CD127          | IL7R                                        | FITC                     | m-IgG1  | eBioRDR5    | eBioscience      | 11-1278-42 | LSR        |
| CD186          | CXCR6                                       | Unconjugated             | m-IgG2b | 56811       | R&D              | MAB699     | LSR        |
| CD186          | CXCR6                                       | BV421                    | m-IgG2a | K041E5      | Biolegend        | 356014     | LSR/Aurora |
| Secondary      | m-Ig                                        | APC                      | g-Ig    | polyclonal  | Becton Dickinson | 550826     | LSR        |
| Secondary      | m-IgG2b                                     | AF647                    | g-IgG   | polyclonal  | Invitrogen       | A21242     | LSR        |
| CD2            | FCGR3A                                      | FITC                     | m-IgG1  | MT910       | DAKO             | f767       | Aurora     |
| CD3            |                                             | BV480                    | m-IgG1  | UCHT1       | Becton Dickinson | 566105     | Aurora     |
| CD3            |                                             | BV785                    | m-IgG1  | UCHT1       | Biolegend        | 300472     | Aurora     |
| CD7            |                                             | AF532                    | m-IgG1  | eBio124-1D1 | eBioscience      | 58-0079-42 | Aurora     |
| CD7            |                                             | R718                     | m-IgG1  | M-T701      | Becton Dickinson | 752079     | Aurora     |
| CD8            |                                             | BUV395                   | m-IgG1  | RPA-T8      | Becton Dickinson | 9317565    | Aurora     |
| CD16           |                                             | BV480                    | m-IgG1  | 3G8         | Becton Dickinson | 566108     | Aurora     |
| CD27           |                                             | APC-Fire 810             | m-IgG1  | QA17A18     | Biolegend        | 393213     | Aurora     |
| CD45           |                                             | APC-H7                   | m-IgG1  | 2D1         | Becton Dickinson | 641417     | Aurora     |
| CD45           |                                             | BUV805                   | m-IgG1  | HI30        | Becton Dickinson | 612891     | Aurora     |
| CD45RA         | ITGA5                                       | BV570                    | m-IgG2b | HI100       | Biolegend        | 304132     | Aurora     |
| CD49e          |                                             | BUV737                   | m-IgG1  | IIA1        | Becton Dickinson | 741849     | Aurora     |
| CD49e          |                                             | BV711                    | m-IgG1  | IIA1        | Becton Dickinson | 740787     | Aurora     |
| CD56           | NCAM                                        | BV650                    | m-IgG2b | NCAM16.2    | Becton Dickinson | 564057     | Aurora     |
| CD57           | SELL                                        | PB                       | m-IgM   | HNK1        | Biolegend        | 359608     | Aurora     |
| CD62L          |                                             | BV605                    | m-IgG1  | DREG-56     | Biolegend        | 304834     | Aurora     |
| CD69           |                                             | BUV737                   | m-IgG1  | FN50        | Becton Dickinson | 612817     | Aurora     |
| CD69           | IL7Ra                                       | BUV805                   | m-IgG1  | FN50        | Becton Dickinson | 748763     | Aurora     |
| CD127          |                                             | PE-Cy5.5                 | m-IgG1  | eBioRDR5    | eBioscience      | 35-1278-42 | Aurora     |
| CD158a+h       |                                             | PE                       | m-IgG1  | EB6         | Beckman Coulter  | A09778     | Aurora     |
| CD158b1+b2+j   | KIR2DL1, KIR2DS1, KIR2DL2, KIR2DL3, KIR2DS2 | PE                       | m-IgG1  | GL183       | Beckman Coulter  | IM2278U    | Aurora     |
| CD158e1        | KIR3DL1                                     | PE                       | m-IgG1  | DX9         | Becton Dickinson | 555967     | Aurora     |
| CD158i         | KIR2DS4                                     | PE                       | m-IgG2a | FES172      | Beckman Coulter  | IM3337     | Aurora     |
| CD159a         | NKG2A                                       | PE-Cy7                   | m-IgG2b | Z199        | Beckman Coulter  | 810246     | Aurora     |
| CD226          | DNAM-1                                      | BUV563                   | m-IgG1  | DX11        | Becton Dickinson | 748429     | Aurora     |
| CD335          | NKp46                                       | Unconjugated             | m-IgG1  | 9E2         | Becton Dickinson | 557911     | Aurora     |
|                | CCL4                                        | PerCP-ef710              | m-IgG2a | FL3423L     | eBioscience      | 46-7540-42 | Aurora     |
|                | CCL5                                        | PE                       | m-IgG2b | VL1         | Biolegend        | 515504     | Aurora     |
|                | CX3CR1                                      | BV786                    | r-IgG2b | 2A9-1       | Becton Dickinson | 744489     | Aurora     |
|                | GZMB                                        | AF700                    | m-IgG1  | GB-11       | Becton Dickinson | 560213     | Aurora     |
|                | GZMB                                        | PE                       | m-IgG1  | GB-11       | Sanquin          | M2289      | Aurora     |
|                | GZMK                                        | AF647                    | m-IgG1  | GM26E7      | Biolegend        | 370503     | Aurora     |
|                | IFNG                                        | PE-Dazzle594             | m-IgG1  | 4S.B3       | Biolegend        | 502546     | Aurora     |
|                | KLRG1                                       | PerCP-ef710              | m-IgG2a | 13F12F2     | eBioscience      | 46-9488-42 | Aurora     |
|                | TIGIT                                       | AF647                    | m-IgG1  | MBSA43      | eBioscience      | 51-9500-42 | Aurora     |
|                | TNFA                                        | AF700                    | m-IgG1  | Mab11       | Biolegend        | 502928     | Aurora     |
|                | XCL1                                        | Unconjugated             | g-IgG   | polyclonal  | R&D              | AF695      | Aurora     |
| Secondary      | g-IgG (H+L)                                 | AF488                    | d-IgG   | polyclonal  | Invitrogen       | A-11055    | Aurora     |
| Secondary      | m-IgG1                                      | AF594                    | g-IgG   | polyclonal  | Invitrogen       | A-21125    | Aurora     |

main abbreviations Type: m=mouse, g=goat, rec=recombinant, h=human, r=rat, g=goat, d=donkey

*Table S2. Oligonucleotide-conjugated antibodies used for single-cell RNA sequencing*

| Specificity    |                  | Antibody characteristics |         |        |           |          |
|----------------|------------------|--------------------------|---------|--------|-----------|----------|
| CD designation | Alternative name | Oligonucleotide          | Type    | Clone  | Company   | Catalog# |
| CD34           |                  | GCAGAAATCTCCCTT          | m-IgG1  | 581    | Biolegend | 343537   |
| CD56           | NCAM             | TCCTTTCCTGATAGG          | m-IgG1  | 5.1H11 | Biolegend | 362557   |
| CD117          | c-KIT            | AGACTAATAGCTGAC          | m-IgG1  | 104D2  | Biolegend | 313241   |
| CD186          | CXCR6            | GACAGTCGATGCAAC          | m-IgG2a | K041E5 | Biolegend | 356021   |

main abbreviations Type: m=mouse
